# Supplementary material for: Methylcellulose/agarose hydrogel loaded with short electrospun PLLA/laminin fibers as an injectable scaffold for tissue engineering/3D cell culture model for tumour therapies
Source: Royal Society of Chemistry journal article supplement (doi:10.1039/d3ra00851g), 2023-01-01
Supplement: d3ra00851g1.pdf [file d3ra00851g1.pdf]

### Supplementary data

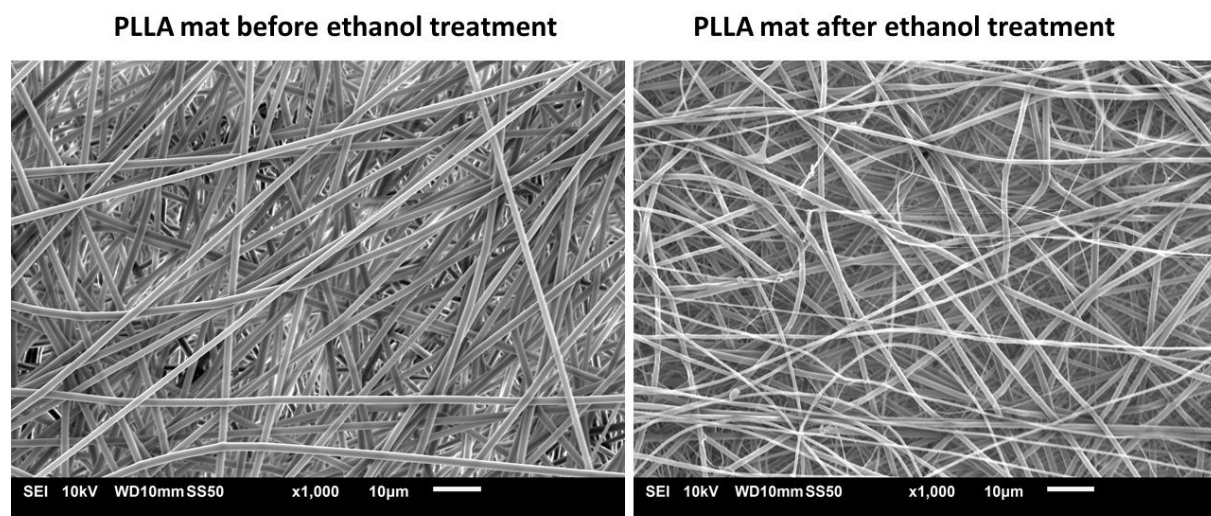

Fig. A. SEM images of PLLA mat before and after 70 % ethanol treatment.

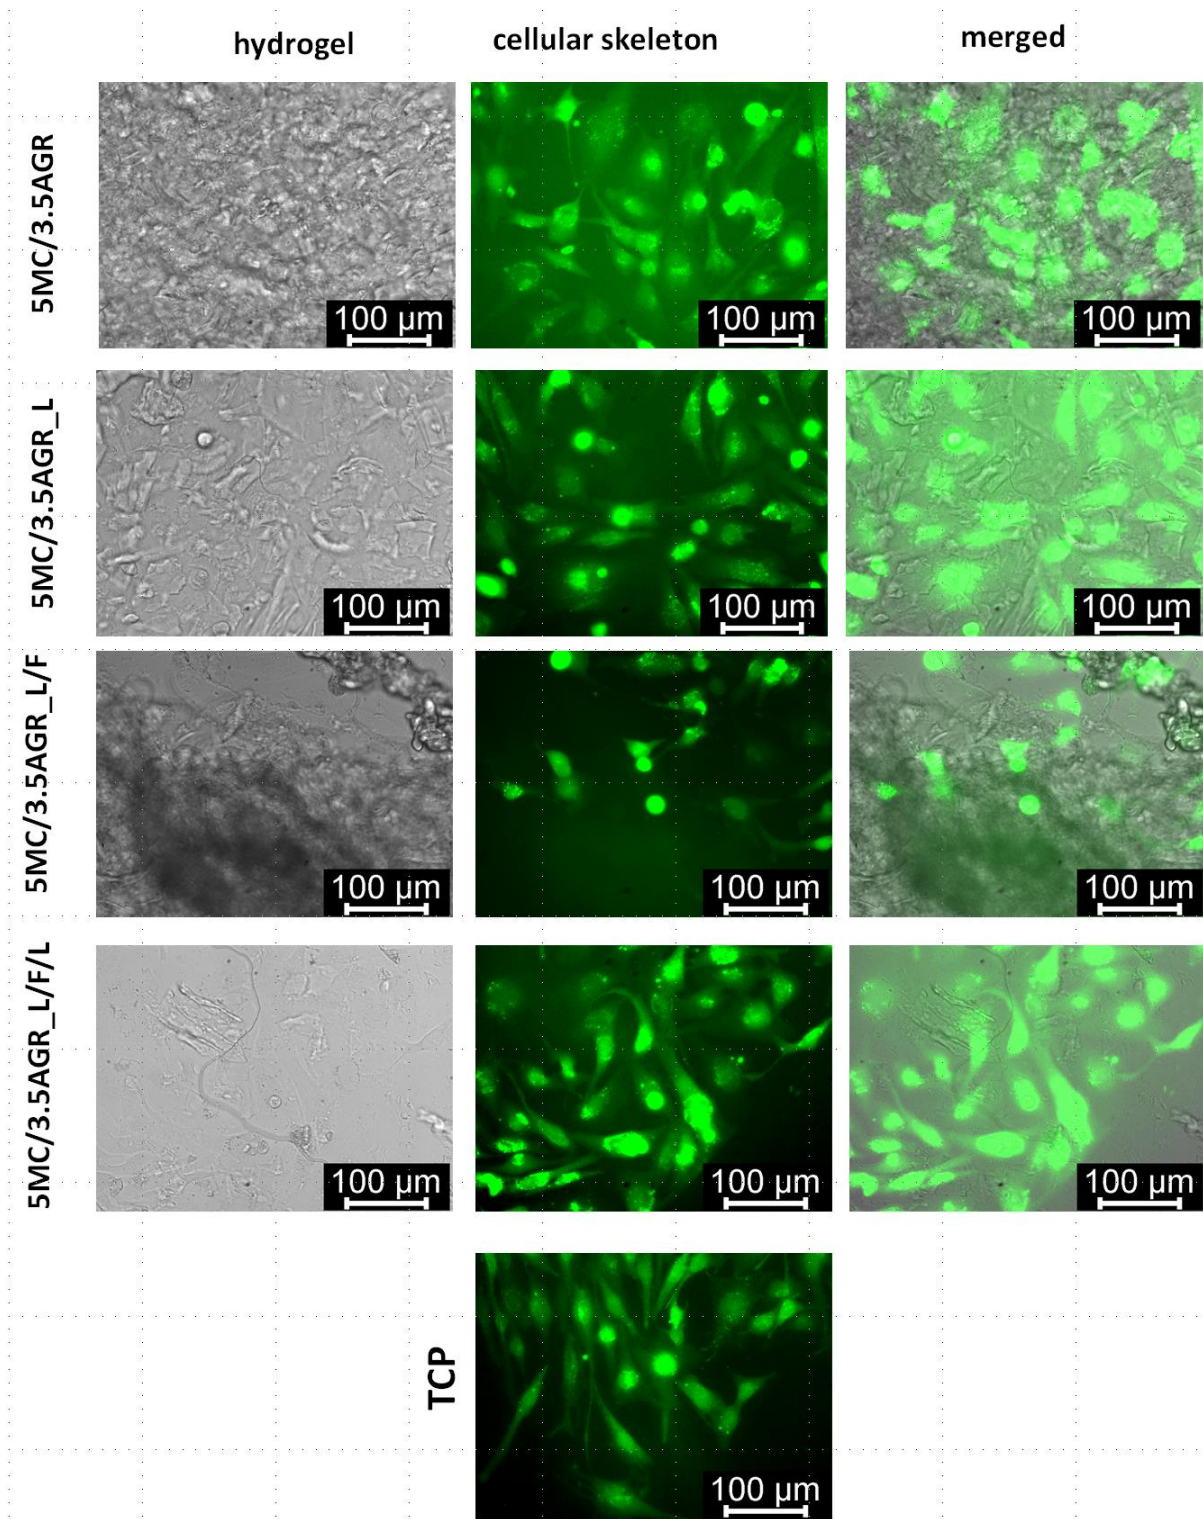

Fig. B. Morphology of the hydrogel (substrate), WG4 skeleton, and merged images of glioma cells seeded on hydrogel at 1 day of culture.

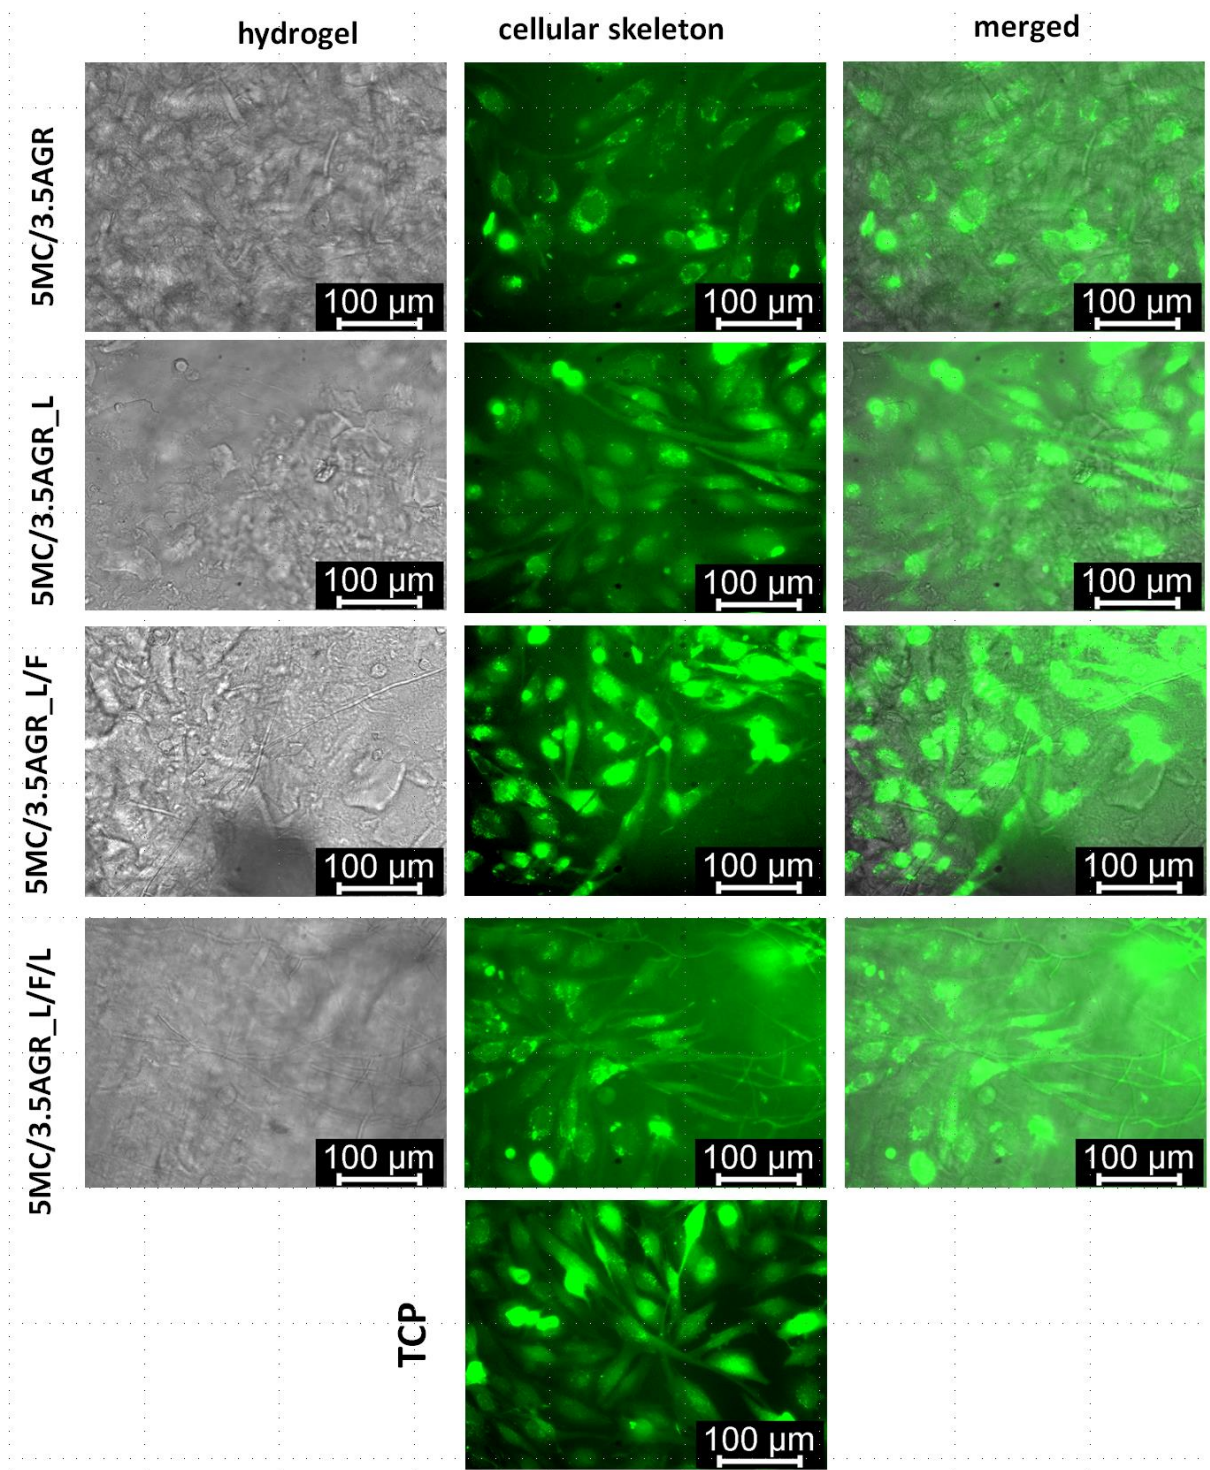

Fig. C. Morphology of the hydrogel (substrate), WG4 skeleton, and merged images of glioma cells seeded on hydrogel at 3 day of culture.
